# Supplementary material
Source: MDPI journal article supplement (https://www.mdpi.com/1996-1073/14/20/6560)
Supplement: s1 [file s1]

## Supplementary material

Fossil fuels and biofuels prices used in the scenario construction section are found in the following table:

**Table S1.** Fuel Prices.

| Fuel                          | Price (USD/GJ) | AAGR | Source       |
|-------------------------------|----------------|------|--------------|
| Firewood                      | 3.23           | -    | [1]          |
| Fuel oil                      | 5.38           | 3.2% | [2–4]        |
| Petroleum coke                | 2.70           | 3.2% | [3,5]        |
| Diesel                        | 23.82          | 0.3% | [3,6]        |
| LPG                           | 16.02          | 1.7% | [3,7]        |
| Dry gas                       | 3.52           | 0.8% | [3,4,8]      |
| Wood pellets                  | 14.58          | 0.9% | [9–22]       |
| Barley spent grain briquettes | 10.46          | -    | [9–19,21–23] |
| Agave bagasse briquettes      | 12.21          | -    | [9–19,21–23] |

Source: Own elaboration based on sources.

The emission factors of the fuels used in the scenarios are found in the following table:

**Table S2.** Fuel Emission Factors.

| Fuel             | Emission factor                                |                                         |                         |                                               |                         |                                |                                 |
|------------------|------------------------------------------------|-----------------------------------------|-------------------------|-----------------------------------------------|-------------------------|--------------------------------|---------------------------------|
|                  | Carbon dioxide (CO <sub>2</sub> ) <sup>1</sup> | Methane (CH <sub>4</sub> ) <sup>1</sup> |                         | Nitrous Oxide (N <sub>2</sub> O) <sup>1</sup> |                         | Carbon Black (CN) <sup>2</sup> |                                 |
|                  | tCO <sub>2e</sub> /GJ*                         | kgCH <sub>4</sub> /GJ                   | kgCO <sub>2e</sub> /GJ* | kgN <sub>2</sub> O/GJ                         | kgCO <sub>2e</sub> /GJ* | kgCN/t firewood                | tCO <sub>2e</sub> /t firewood * |
| Firewood         | 0.0381**                                       | 0.030                                   | 0.840                   | 0.004                                         | 1.0240                  | 1,048                          | 943.2                           |
| Oils             | 0.0733                                         | 0.003                                   | 0.084                   | 0.001                                         | 0.1536                  | -                              | -                               |
| Plastics         | 0.0917                                         | 0.030                                   | 0.840                   | 0.004                                         | 1.0240                  | -                              | -                               |
| Other energetics | 0.0917                                         | 0.030                                   | 0.840                   | 0.004                                         | 1.0240                  | -                              | -                               |
| Fuel oil         | 0.0774                                         | 0.003                                   | 0.084                   | 0.001                                         | 0.1536                  | -                              | -                               |
| Petroleum coke   | 0.0975                                         | 0.003                                   | 0.084                   | 0.001                                         | 0.1536                  | -                              | -                               |
| Diesel           | 0.0741                                         | 0.003                                   | 0.084                   | 0.001                                         | 0.1536                  | -                              | -                               |
| LPG              | 0.0631                                         | 0.001                                   | 0.028                   | 0.000                                         | 0.0256                  | -                              | -                               |
| Dry gas          | 0.0056                                         | 0.001                                   | 0.028                   | 0.000                                         | 0.0256                  | -                              | -                               |

\* GWP CO<sub>2</sub> = 1; GWP CH<sub>4</sub> = 28; GWP N<sub>2</sub>O = 256. GWP CN = 900. \*\* Emissions are estimated considering a firewood non-renewability factor of 34% [24]. Source: Own elaboration based on [25]<sup>1</sup> and [1]<sup>2</sup>.

## References

1. Instituto Nacional de Ecología y Cambio Climático (INECC). Estudio Para Desarrollar Un Modelo de Negocio Piloto En Ladrilleras Artesanales, Para Reducir Emisiones de Contaminantes Climáticos de Vida Corta y Gases de Efecto Invernadero, Así Como Mejorar La Calidad de Vida de Los Actores Clave Available online: [https://www.gob.mx/cms/uploads/attachment/file/493391/Ladrilleras\\_versi\\_n\\_final-2019.pdf](https://www.gob.mx/cms/uploads/attachment/file/493391/Ladrilleras_versi_n_final-2019.pdf) (accessed on 25 August 2021).
2. US Energy Information Administration (EIA). Annual Energy Outlook 2018 with Projections to 2050. Table 3. Energy Prices by Sector and Source. Case: Reference Case. Region: United States. Available online: <https://www.eia.gov/outlooks/archive/aeo18/pdf/AEO2018.pdf> (accessed on 25 August 2021).
3. US Energy Information Administration (EIA). Annual Energy Outlook 2020 with Projections to 2050. Table 3. Energy Prices by Sector and Source. Case: Reference Case. Region: United States. Available online: <https://www.eia.gov/outlooks/aeo/pdf/AEO2020%20Full%20Report.pdf> (accessed on 25 August 2021).
4. Secretaría de Energía (SENER). Sistema de Información Energética (SIE). Estructura de Precios. Available online: <http://sie.energia.gob.mx/> (accessed on 10 March 2020).
5. Secretaría de Economía. Sistema de Información Arancelaria Vía Internet (SIAVI) . Valor y Volumen de Las Importaciones. Combustibles Minerales, Aceites Minerales y Productos de Su Destilación; Materias Bituminosas; Ceras Minerales. Available online: <http://www.economia-snci.gob.mx/> (accessed on 12 August 2020).
6. Comisión Reguladora de Energía (CRE). Precios de Gasolina y Diesel. Available online: <https://www.gob.mx/cre/articulos/precios-vigentes-de-gasolinas-y-diesel> (accessed on 13 February 2020).
7. Comisión Reguladora de Energía (CRE). Historial de Precios Promedio al Público de Gas LP Reportados Por Los Distribuidores. Historial de Precios Promedio Por Entidad Federativa. Available online: <https://www.gob.mx/cre/documentos/historial-de-precios-promedio-al-publico-de-gas-lp-reportados-por-los-distribuidores> (accessed on 16 March 2020).
8. Comisión Federal de Electricidad (CFE). Evolución de Precios Entregados y Fletes de Combustibles 2003 - 2004.; 2005;
9. Amigo Borgeau, P.A.; Villaroel Gallardo, G.I. Estudio de Prefactibilidad Para La Implementación de Una Planta Briquetadora En El Aserradero de La Empresa Salfa de Punta Arenas, Universidad de Magallanes: Chile, **2011**, p. 91.
10. Bahamondes Levio, M. Formulación y Evaluación de Proyecto de Fábrica de Pellets de Madera En La Región de Los Lagos, Universidad Austral de Chile: Chile, **2015**, p. 87.
11. Cejudo, B. Costos de Construcción. Available online: <https://sites.google.com/site/braucejudo/terra/costos-de-construccion-1> (accessed on 17 November 2020).
12. Comisión Federal de Electricidad (CFE). Tarifas DIT. Available online: <https://app.cfe.mx/Aplicaciones/CCFE/Tarifas/TarifasCREIndustria/Tarifas/DemandaIndustrialTran.aspx> (accessed on 30 April 2020).
13. Flores-Hernández, U., Jaeger, D., & Islas-Samperio, J. Bioenergy Potential and Utilization Costs for the Supply of Forest Woody Biomass for Energetic Use at a Regional Scale in Mexico. *Energies* 2017, 10 (8), doi:<https://doi.org/10.3390/en10081192>.
14. Neuvo. Salario de Chofer Trailer En México. Available online: <https://neuvo.com.mx/salario/?job=chofer+traile> (accessed on 13 August 2020).
15. Neuvo. Salario de Encargado de Planta En México. Available online: <https://neuvo.com.mx/salario/?job=encargado+planta> (accessed on 13 August 2020).
16. Neuvo. Salario de Jefe de Administración En México. Available online: <https://neuvo.com.mx/salario/?job=jefe+de+administracion+> (accessed on 13 August 2020).
17. Neuvo. Salario de Operario de Producción En México. Available online: <https://neuvo.com.mx/salario/?job=operario+de+produccion> (accessed on 13 August 2020).
18. Neuvo. Salario Gerente de Planta En México. Available online: <https://neuvo.com.mx/salario/?job=Gerente+De+Planta> (accessed on 13 August 2020).
19. Ríos-Badrán, I. M., Luzardo-Ocampo, I., Santos-Cruz, J., García-Trejo, J. F., & Gutiérrez-Antonio, C. Biocombustibles Sólidos: Una Alternativa Económica y Sostenible Para La Generación de Energía Eléctrica En México. 2395-8847 2019, 61–66.
20. Roni, M. S., Lamers, P., & Hoefnagels, R. Investigating the Future Supply Distribution of Industrial Grade Wood Pellets in the Global Bioenergy Market. *Biofuels* **2018**, 7269, 1–14, doi:<https://doi.org/10.1080/17597269.2018.1432268>.

21. Tauro, R., García, C. A., Skutsch, M., & Masera, O., The Potential for Sustainable Biomass Pellets in Mexico: An Analysis of Energy Potential, Logistic Costs and Market Demand. *Renewable and Sustainable Energy Reviews* **2018**, 82, 380–389, doi:<https://doi.org/10.1016/j.rser.2017.09.036>.
22. Morales V.; Esteban A. Factibilidad Técnico-Económica Para La Implementación de Un Centro de Producción de Astillas Pulpables En Aserraderos Corza, S.A., Universidad de Chile: Chile, **2008**, p. 60.
23. Liñán-Montes, A., De La Parra-Arciniega, S. M., Garza-González, M. T., García-Reyes, R. B., Soto-Regalado, E., & Cerino-Córdova, F. J. Characterization and Thermal Analysis of Agave Bagasse and Malt Spent Grain. *Journal of Thermal Analysis and Calorimetry* **2014**, 751–758, doi:<https://doi.org/10.1007/s10973-013-3321-y>.
24. Serrano-Medrano, M.; Ghilardi, A.; Masera, O. Fuelwood Use Patterns in Rural Mexico: A Critique to the Conventional Energy Transition Model. *Historia Agraria* **2019**, 81–104, doi:10.26882/histagrar.077e04s.
25. Diario Oficial de la Federación (DOF). Acuerdo Que Establece Las Particularidades Técnicas y Las Fórmulas Para La Aplicación de Metodologías Para El Cálculo de Emisiones de Gases o Compuestos de Efecto Invernadero. Available online: <http://extwprlegs1.fao.org/docs/pdf/mex148399.pdf> (accessed on 25 August 2021).
